# Supplementary material for: Advancing structural batteries: cost-efficient high-performance carbon fiber-coated LiFePO4 cathodes
Source: Royal Society of Chemistry journal article supplement (doi:10.1039/d3ra05228a), 2023-01-01
Supplement: d3ra05228a1.pdf [file d3ra05228a1.pdf]

## Supporting Information for:

### Advancing Structural Batteries: Cost-Efficient High-Performance

#### Carbon Fiber-Coated LiFePO<sub>4</sub> Cathodes

Jaehoon Choi, Omid Zabihi, Mojtaba Ahmadi, Minoo Naebe\*  
Carbon Nexus, Institute for Frontier Materials (IFM), Deakin University, Waurn Ponds, VIC, 3216,  
Australia

\*Corresponding Author: minoo.naebe@deakin.edu.au

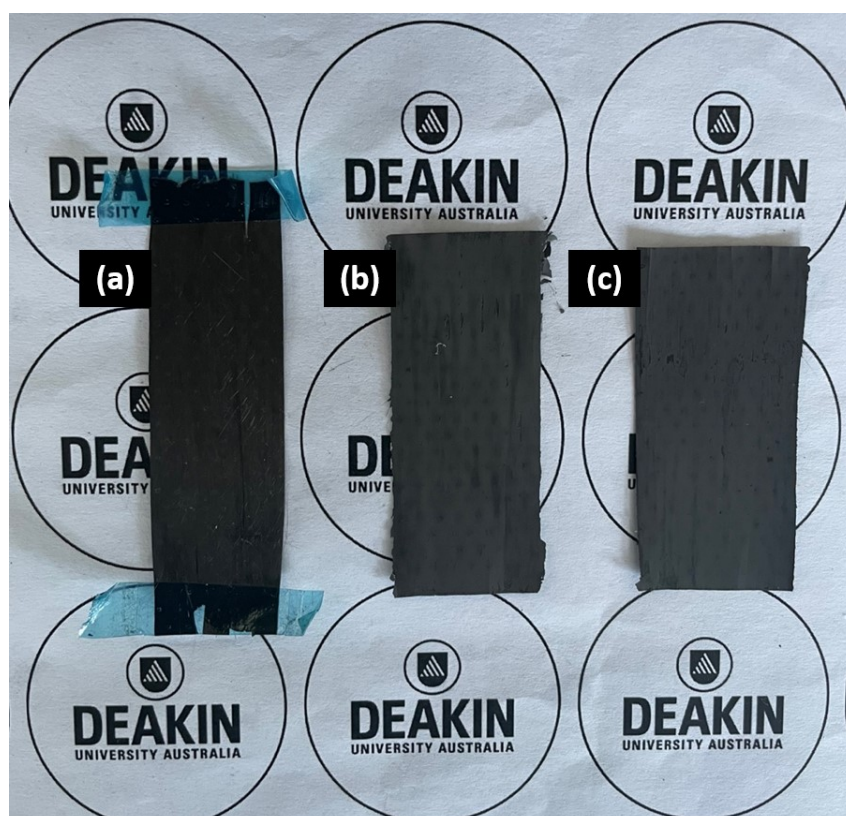

**Figure S1.** A picture of LiFePO<sub>4</sub> coating performance onto carbon fibre tow (CF); (a) carbon fibre tow substrate which is fabricated PVDF binder prior to coating LiFePO<sub>4</sub> (b) 90 LiFePO<sub>4</sub>/CF and (c) 78 LiFePO<sub>4</sub>/CF.

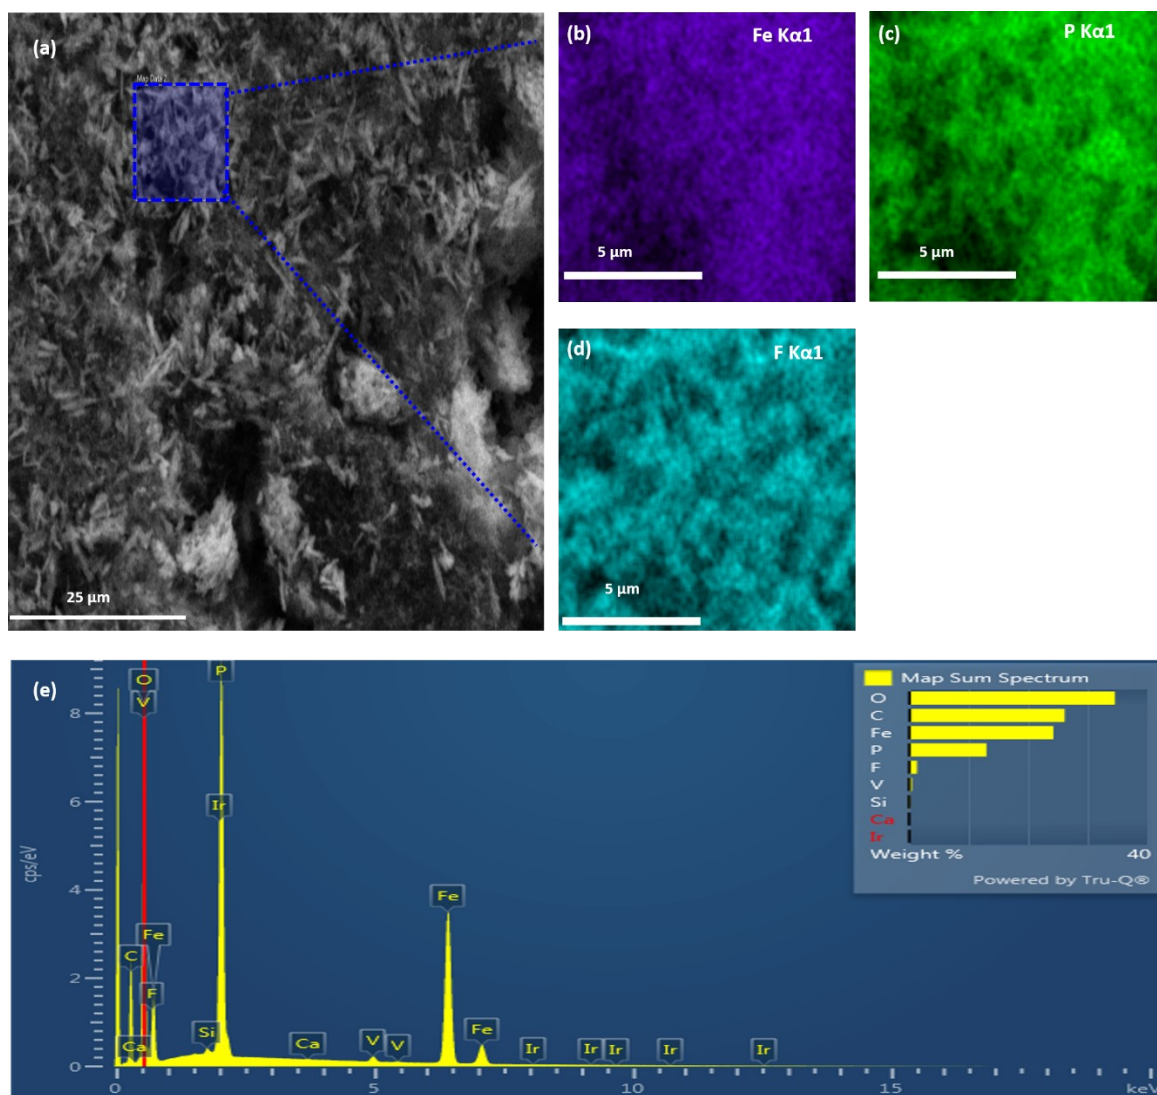

**Figure S2.** EDX map of 78 LiFePO<sub>4</sub>/CF; (a) EDX mapping image, (b & c) a homogenous LFP distribution via Fe and P, (d) PVDF binder via F and (e) the spectrum of EDX.
